# Supplementary material for: Esthétique des mythologies individuelles : le dispositif photographique de Nadja à Sophie Calle
Source: Royal Society of Chemistry journal article supplement (doi:10.1039/c9ob00110g), 2008-06-17
Supplement: c9ob00110g1.pdf [file c9ob00110g1.pdf]

**Versispiroketal A, an unusual tetracyclic bridged spiroketal from the  
sponge-associated fungus *Aspergillus versicolor* SCSIO 41013**

Salendra Limbadri,<sup>a,b,‡</sup> Xiaowei Luo,<sup>a,b,‡</sup> Xiuping Lin,<sup>a</sup> Junfeng Wang,<sup>a</sup> Bin Yang,<sup>a</sup> Xuefeng  
Zhou,<sup>a</sup> and Yonghong Liu<sup>\*,a,b,c</sup>

<sup>a</sup>CAS Key Laboratory of Tropical Marine Bio-resources and Ecology/Guangdong Key Laboratory  
of Marine Materia Medica, South China Sea Institute of Oceanology, Chinese Academy of  
Sciences, Guangzhou 510301, China

<sup>b</sup>University of Chinese Academy of Sciences, Beijing 100049, China

<sup>c</sup>Institution of South China Sea Ecology and Environmental Engineering, Chinese Academy of  
Sciences, Guangzhou 510301, China

**Corresponding Author**

\*Tel/Fax: +8620-8902-3244. E-mail: yonghongliu@scsio.ac.cn (Y. Liu).

**Notes**

‡S. Limbadri and X. Luo contributed equally.

## Table of contents

**Figure S1.** The ITS gene sequence data of *Aspergillus versicolor* SCSIO 41013

**Table S1.** Energies of **1** at MMFF94 force field.

**Table S2.** Energies of **1** at B3LYP/6-31+g(d) level in methanol.

**Figure S2.** The optimized conformers and equilibrium populations of **1**

**Figure S3.** <sup>1</sup>H NMR spectrum of versispiroketal A (**1**) (DMSO-*d*<sub>6</sub>, 500 MHz)

**Figure S4.** <sup>13</sup>C NMR and DEPT spectra of versispiroketal A (**1**) (DMSO-*d*<sub>6</sub>, 125 MHz)

**Figure S5.** HSQC spectrum of versispiroketal A (**1**) (DMSO-*d*<sub>6</sub>)

**Figure S6.** HMBC spectrum of versispiroketal A (**1**) (DMSO-*d*<sub>6</sub>)

**Figure S7.** <sup>1</sup>H-<sup>1</sup>H COSY spectrum of versispiroketal A (**1**) (DMSO-*d*<sub>6</sub>)

**Figure S8.** NOESY spectrum of versispiroketal A (**1**) (DMSO-*d*<sub>6</sub>)

**Figure S9.** HRESIMS spectrum of versispiroketal A (**1**)

**Figure S10.** IR spectrum of versispiroketal A (**1**)

**Figure S11.** UV spectrum of versispiroketal A (**1**)

TTGGAAGAGAAAAAGATGTAACAAGGTTTCCGTAGGTGAACCTGCGGAA  
GGATCATTACTGAGTGCGGGCTGCCTTCGGGCGCCCAACCTCCCACCCGT  
GACTACCTAACACTGTTGCTTCGGCGGGGAGCCCTCTCGGGGGCGCGCCG  
CCGGGGACTACTGAACTTCATGCCTGAGAGTGATGCAGTCTGAGTCTGAA  
TATAAAATCAGTCAAACTTTCAACAATGGATCTCTTGGTTCCGGCATCGA  
TGAAGAACGCAGCGAACTGCGATAAGTAATGTGAATTGCAGAATTCAGTG  
AATCATCGAGTCTTTGAACGCACATTGCGCCCCCTGGCATTCCGGGGGGC  
ATGCCTGTCCGAGCGTCATTGCTGCCATCAAGCCCGGCTTGTGTGTTGGG  
TCGTCGTCCCCCGGGGGACGGGCCCGAAAGGCAGCGGCAGCGGCACCGTGT  
CCGGTCCTCGAGCGTATGGGGCTTTGTCACCCGCTCGATTTAGGGCCGGCC  
GGGCGCCAGCCGACGTCCAACCATTTTTCTTCAGGTTGACCTCGGATCAG  
GTAGGGATACCCGCTGAACTTAAGCATATCTAGACCGCGGAAGAAA

**Figure S1.** The ITS gene sequence data of *Aspergillus versicolor* SCSIO 41013

**Table S1. Energies of 1 at MMFF94 force field.**

| Configuration   | Conformer | Energy (kcal/mol) | Population (%) |
|-----------------|-----------|-------------------|----------------|
| (1R,5S,6S,8R)-1 | 1         | 512.31            | 56.9           |
| (1R,5S,6S,8R)-1 | 2         | 513.23            | 39.4           |
| (1R,5S,6S,8R)-1 | 3         | 519.17            | 3.6            |
| (1R,5S,6S,8R)-1 | 4         | 532.38            | 0.0            |

**Table S2. Energies of 1 at B3LYP/6-31+g(d) level in methanol.**

| Configuration   | Conformer | E (Hartree)   | E (kcal/mol)      | Population (%) |
|-----------------|-----------|---------------|-------------------|----------------|
| (1R,5S,6S,8R)-1 | 1         | -1110.2925889 | -696719.702460639 | 19.02          |
| (1R,5S,6S,8R)-1 | 2         | -1110.2930406 | -696719.985906906 | 30.71          |
| (1R,5S,6S,8R)-1 | 3         | -1110.2930227 | -696719.974674477 | 30.13          |

(1*R*,5*S*,6*S*,8*R*)-1      4      -1110.2926427      -696719.736220677      20.14

---

(1*R*,5*S*,6*S*,8*R*)-1

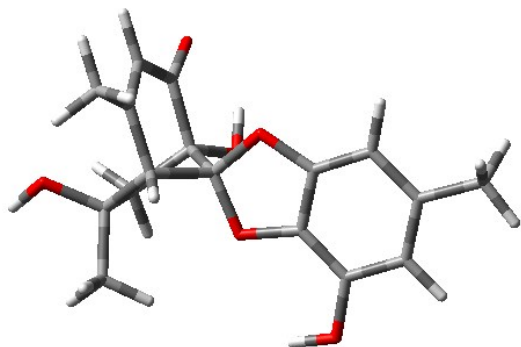

Conf.1 (19.02%)

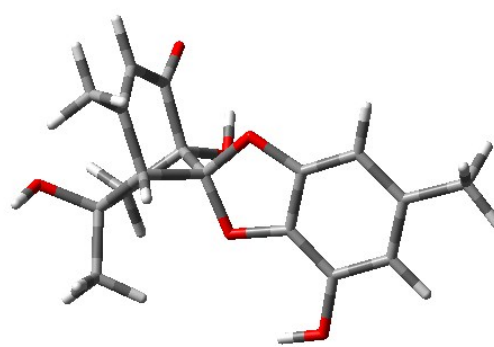

Conf.2 (30.71%)

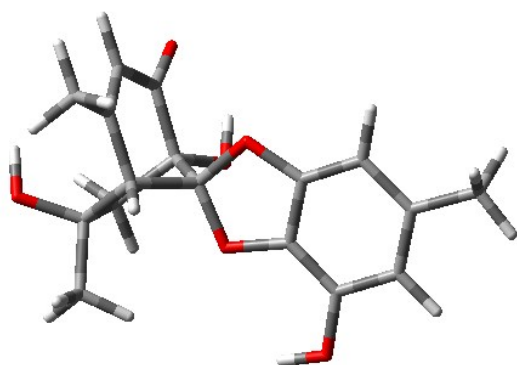

Conf.3 (30.13%)

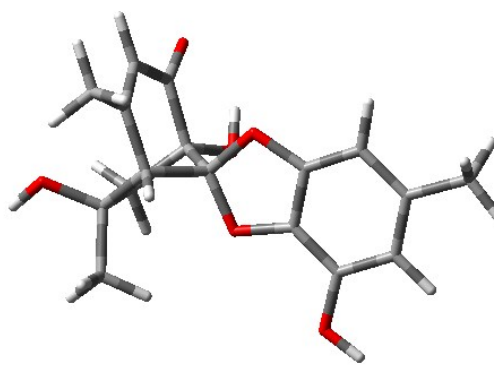

Conf.4 (20.14%)

**Figure S2.** The optimized conformers and equilibrium populations of **1**

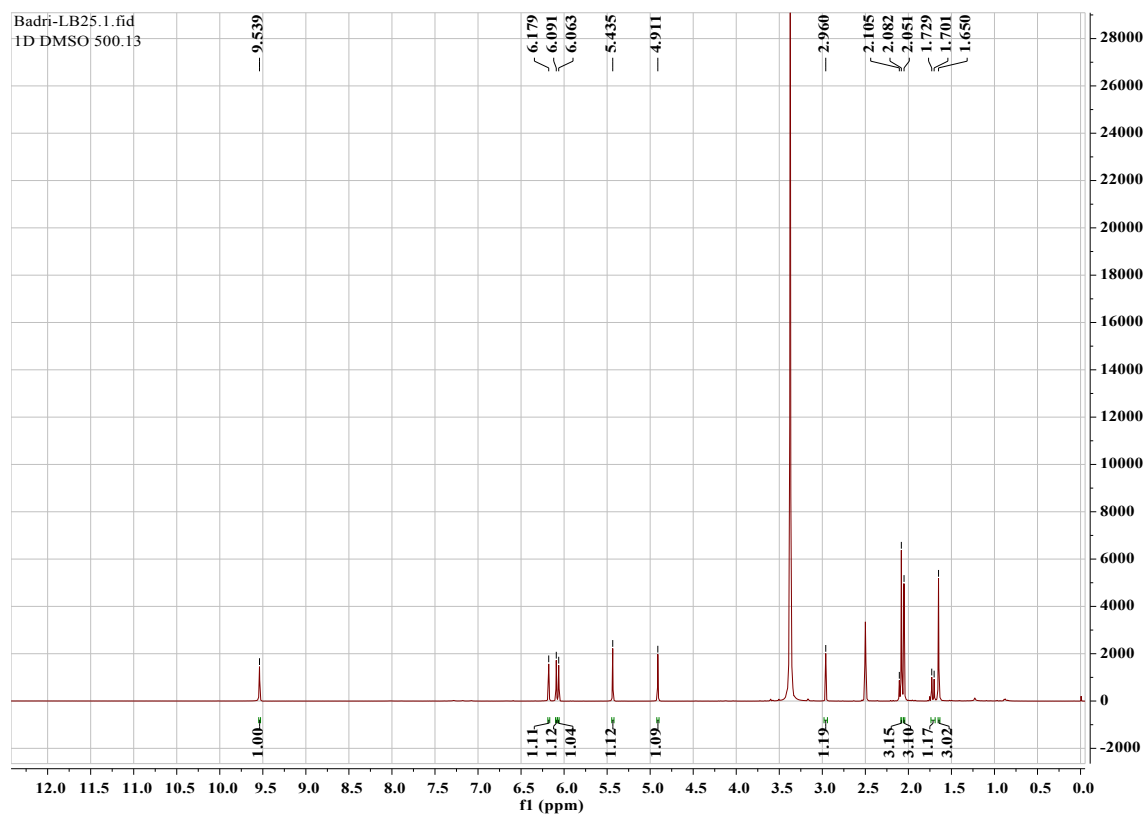

**Figure S3.**  $^1\text{H}$  NMR spectrum of versispiroketal A (**1**) ( $\text{DMSO-}d_6$ , 500 MHz)

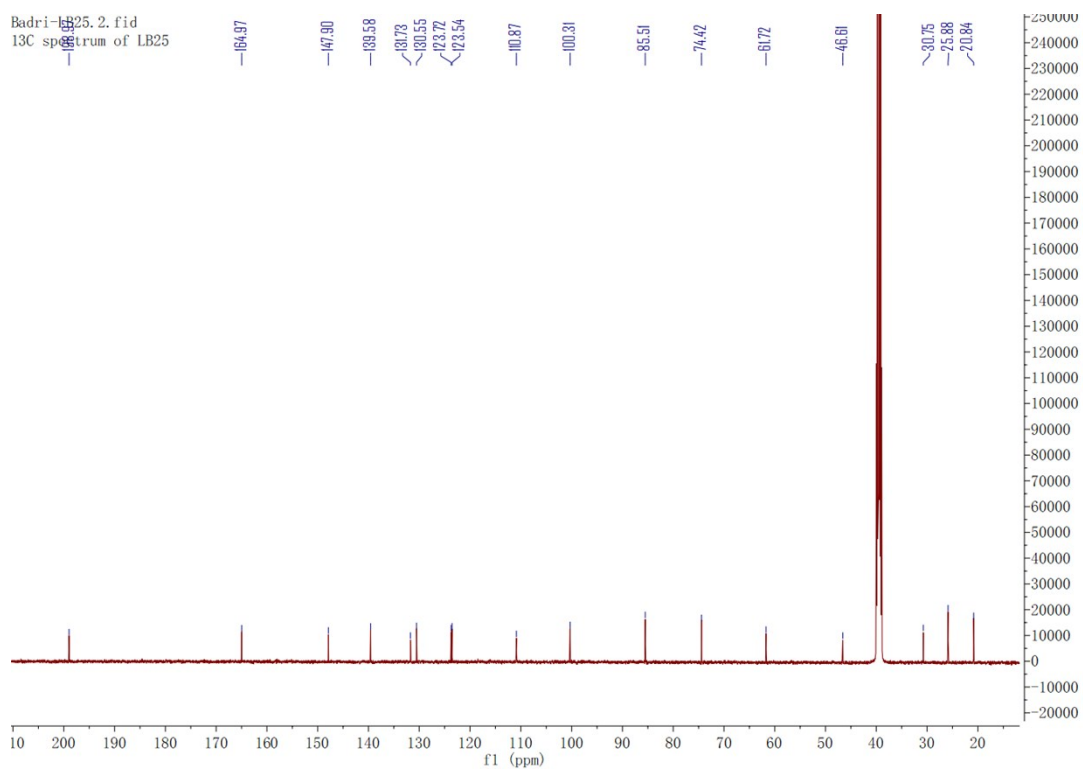

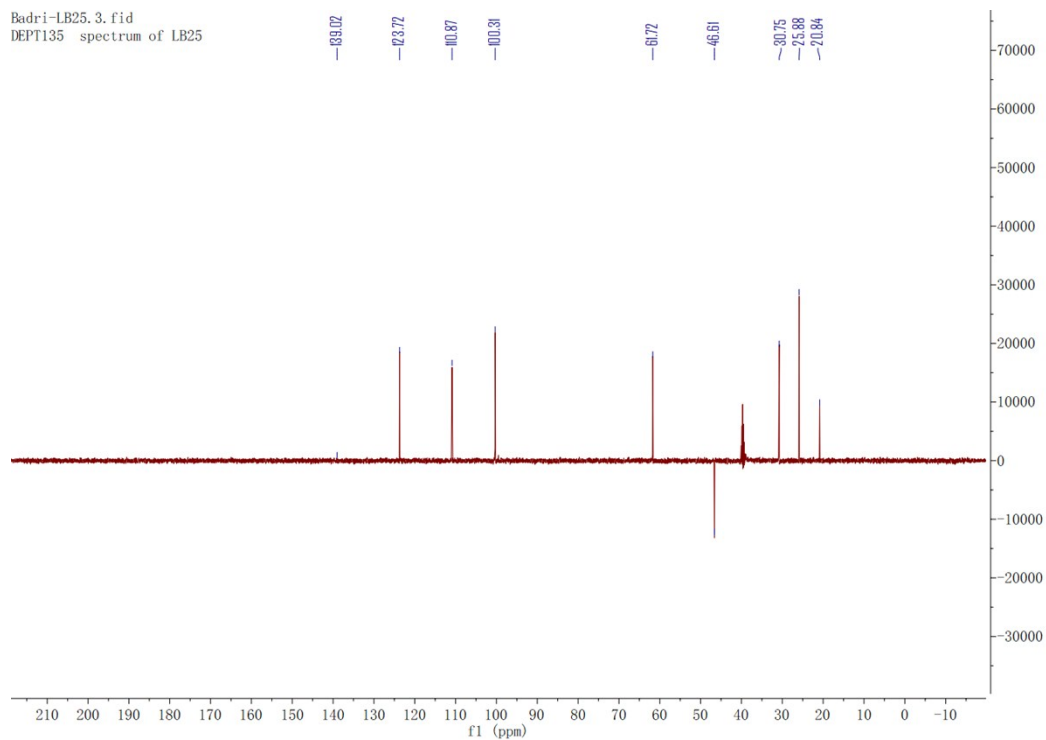

**Figure S4.**

$^{13}\text{C}$  NMR and DEPT spectra of versispiroketal A (**1**) (DMSO- $d_6$ , 125 MHz)

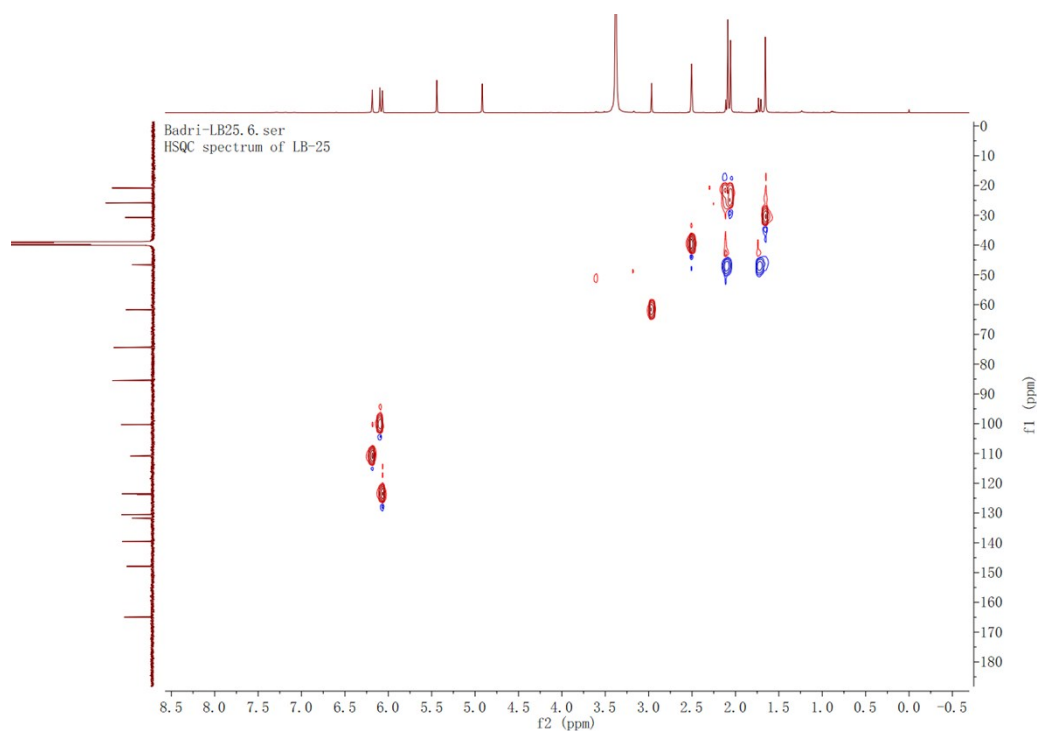

**Figure S5.** HSQC spectrum of versispiroketal A (**1**) (DMSO- $d_6$ )

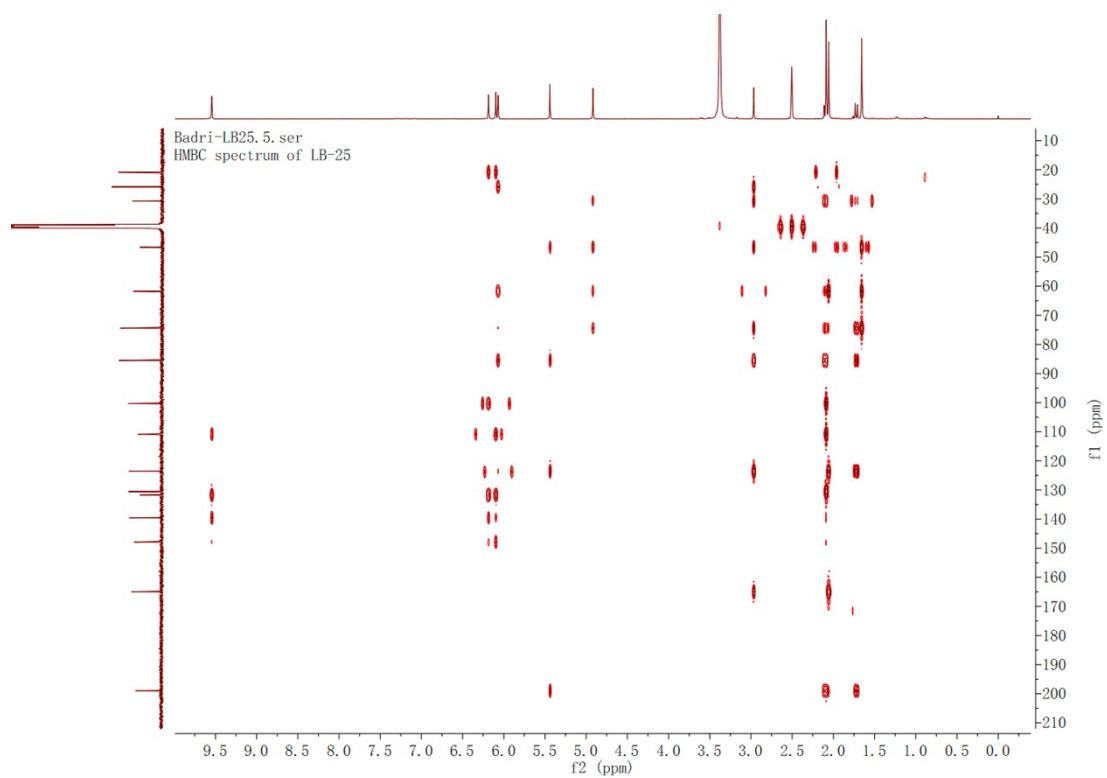

**Figure S6.** HMBC spectrum of versispiroketal A (**1**) (DMSO- $d_6$ )

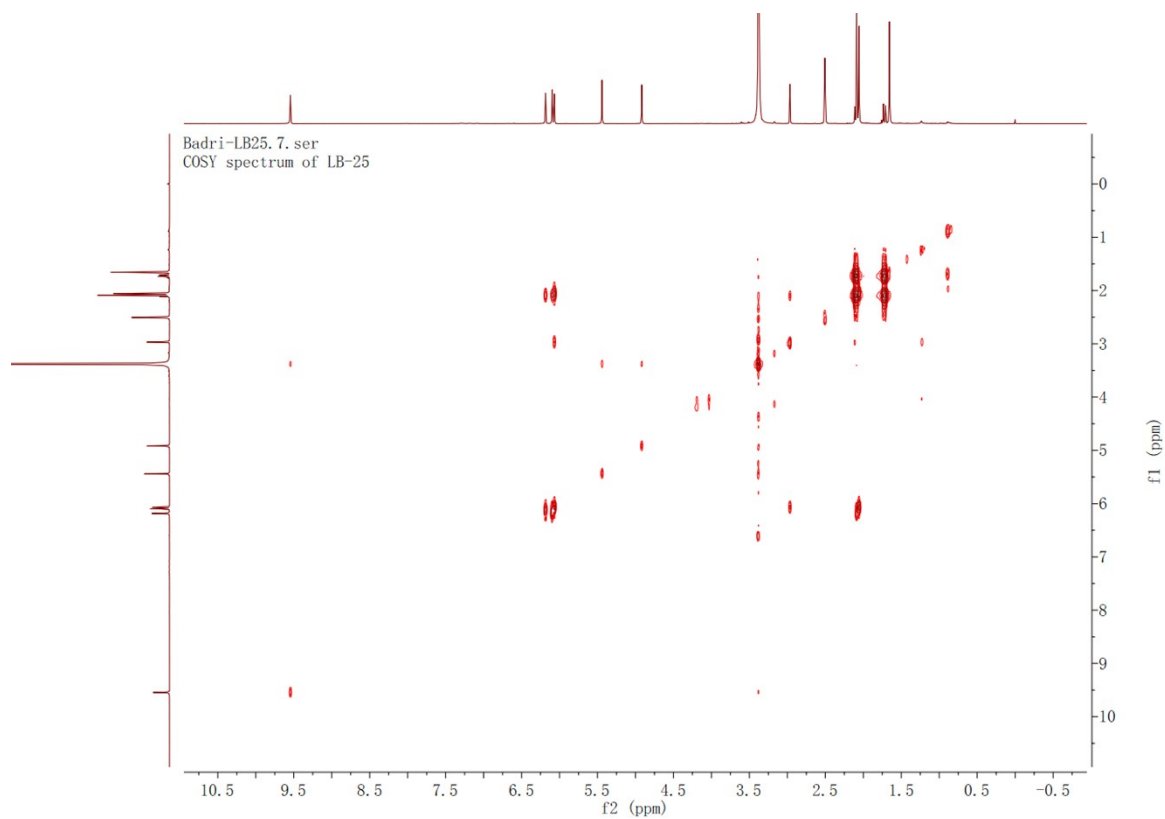

**Figure S7.**  $^1\text{H}$ - $^1\text{H}$  COSY spectrum of versispiroketal A (**1**) (DMSO- $d_6$ )

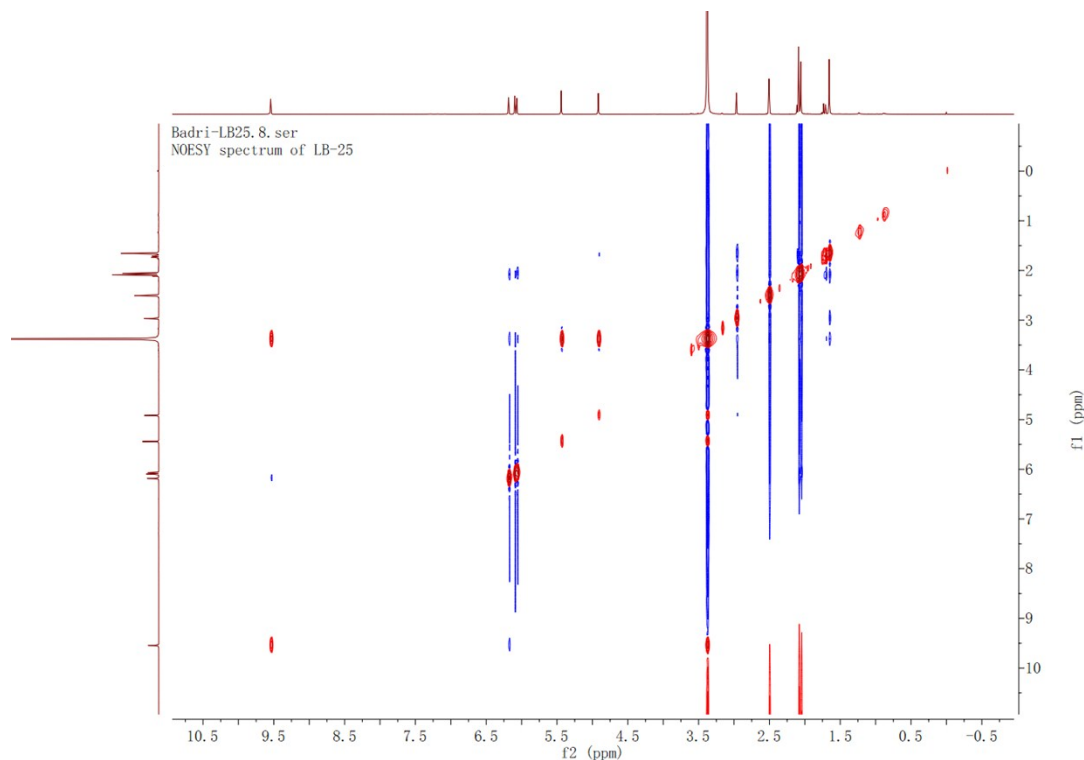

**Figure S8.** NOESY spectrum of versispiroketal A (1) (DMSO- $d_6$ )

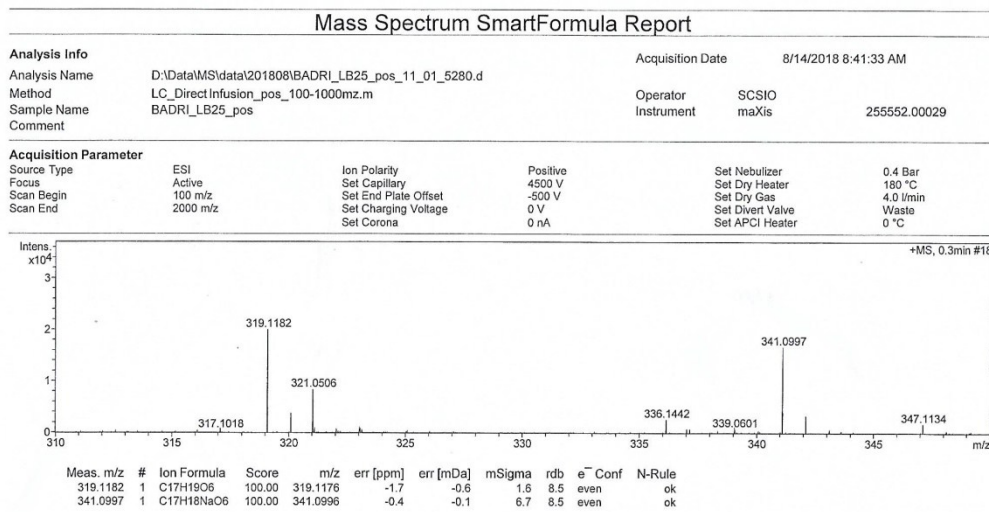

BADRI\_LB25\_pos\_11\_01\_5280.d  
Bruker Compass DataAnalysis 4.1

printed: 8/14/2018 8:52:58 AM

by: SCSIO

Page 1 of 1

**Figure S9.** HR-ESIMS spectrum of versispiroketal A (1)



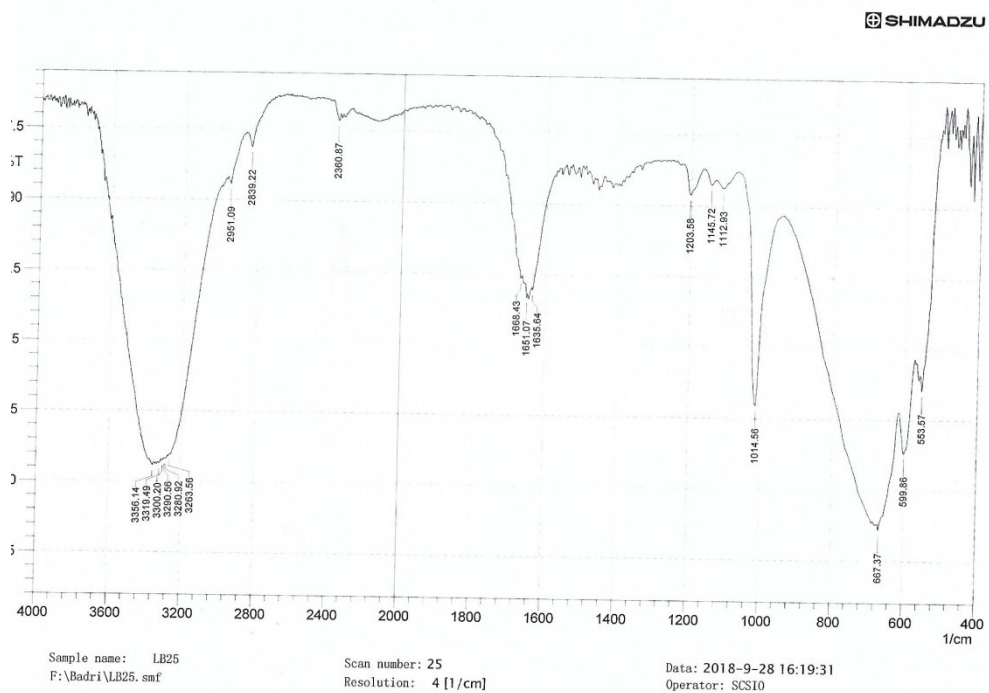

**Figure S10.** IR spectrum of versispiroketal A (1)

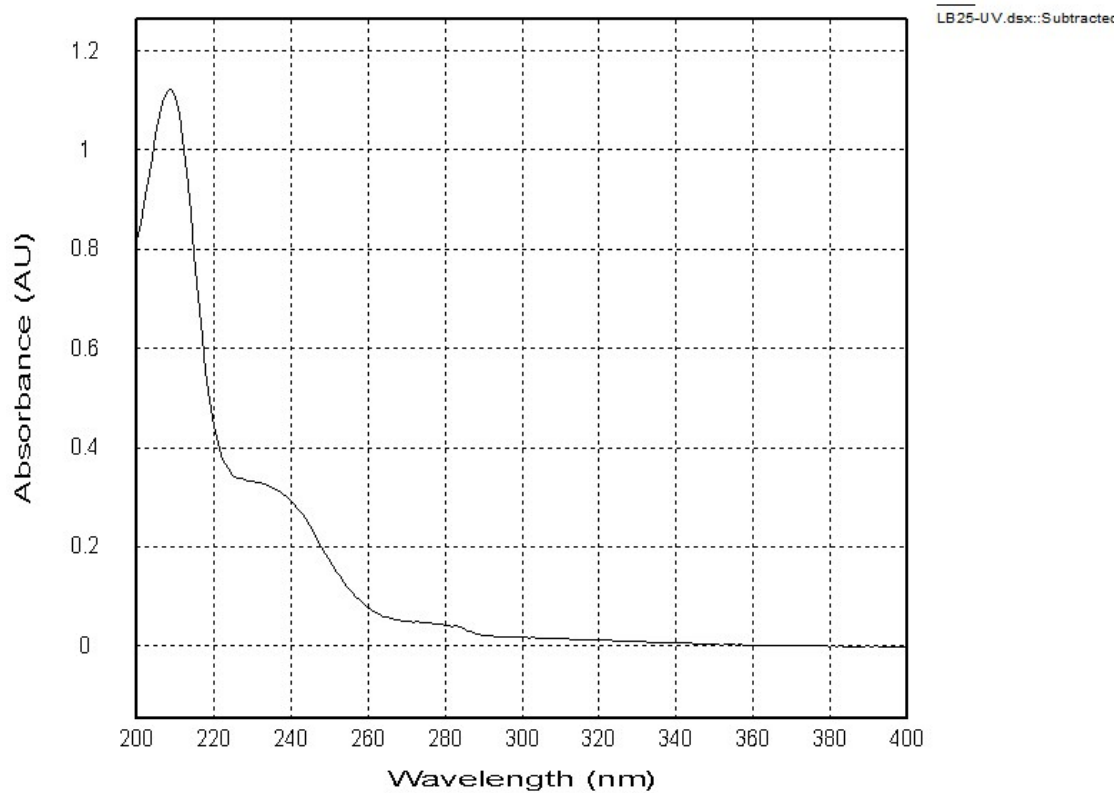

**Figure S11.** UV spectrum of versispiroketal A (1)
